# Supplementary material for: The Combination of β ‐Asarone and Icariin Inhibits Amyloid‐ β and Reverses Cognitive Deficits by Promoting Mitophagy in Models of Alzheimer’s Disease
Source: Hindawi journal article supplement (doi:10.1155/2021/7158444), 2021-01-01
Supplement: f1 [file 7158444.f1.pdf]

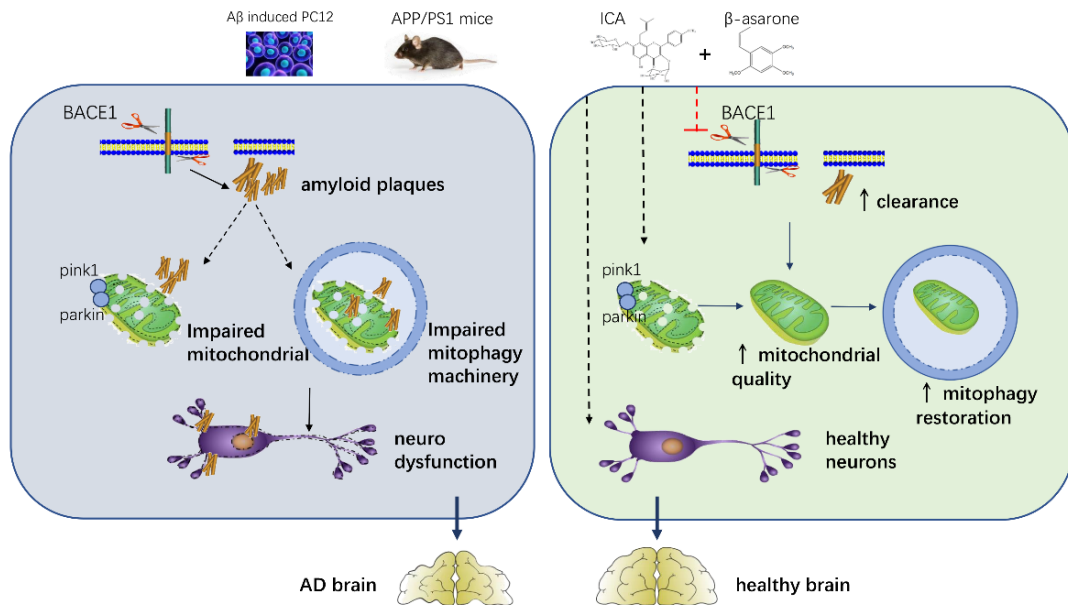

Graph abstract. In APP/PS1 mouse and  $A\beta_{1-42}$  in induced PC12 cell models, The amyloid plaques formed by BACE1 shearing APP impair mitochondrial function and autophagy. This results in impaired nerve function and increased metabolic burden in the brain.  $\beta$ -Asarone is the main constituents of *Acorus tatarinowii* Schott and plays important effects in diseases such as neurodegenerative and neurovascular diseases. Icariin (ICA) is a major active ingredient of *Epimedium* which attracting increasing attention because of its unique pharmacological effects in degenerative disease. The combination should inhibited cell and mitochondrial damage via induced autophagy/mitophagy. Therefore, the function of mitochondria and autophagy are repaired, the precipitation of toxic proteins is reduced, and the neurological function is recovered.
